# Supplementary material
Source: publisher figshare collection journal article supplement (https://acs.figshare.com/ndownloader/files/7394032)
Supplement: Supplementary file 1 [file 7394032]

Compound_ID	SMILES	IC50 (¦ÌM) for K562	IC50 (¦ÌM) for K562/A02
7a	O=C(CN1CCC(OC(C2=CC(OC)=C3C(OCO3)=C2C4=C(C(OC)=O)C=C(OC)C5=C4OCO5)=O)CC1)OCCCCOC6=NO[N+]([O-])=C6S(=O)(C7=CC=CC=C7)=O	0.69 ¡À 0.03	0.55 ¡À 0.04
7b	O=C(CN1CCC(OC(C2=CC(OC)=C3C(OCO3)=C2C4=C(C(OC)=O)C=C(OC)C5=C4OCO5)=O)CC1)OCCCOC6=NO[N+]([O-])=C6S(=O)(C7=CC=CC=C7)=O	0.80 ¡À 0.05	0.59 ¡À 0.03
7c	O=C(CN1CCC(OC(C2=CC(OC)=C3C(OCO3)=C2C4=C(C(OC)=O)C=C(OC)C5=C4OCO5)=O)CC1)OCCOC6=NO[N+]([O-])=C6S(=O)(C7=CC=CC=C7)=O	0.51 ¡À 0.06	0.65 ¡À 0.05
7d	O=C(CN1CCC(OC(C2=CC(OC)=C3C(OCO3)=C2C4=C(C(OC)=O)C=C(OC)C5=C4OCO5)=O)CC1)NCCOC6=NO[N+]([O-])=C6S(=O)(C7=CC=CC=C7)=O	1.28 ¡À 0.09	3.16 ¡À 0.57
7e	O=C(CN1CCC(OC(C2=CC(OC)=C3C(OCO3)=C2C4=C(C(OC)=O)C=C(OC)C5=C4OCO5)=O)CC1)OCCOCCOC6=NO[N+]([O-])=C6S(=O)(C7=CC=CC=C7)=O	0.64 ¡À 0.04	0.89 ¡À 0.06
7f	O=C(CN1CCC(OC(C2=CC(OC)=C3C(OCO3)=C2C4=C(C(OC)=O)C=C(OC)C5=C4OCO5)=O)CC1)OC(C)CCOC6=NO[N+]([O-])=C6S(=O)(C7=CC=CC=C7)=O	0.39 ¡À 0.04	0.76 ¡À 0.06
7g	O=C(CN1CCC(OC(C2=CC(OC)=C3C(OCO3)=C2C4=C(C(OC)=O)C=C(OC)C5=C4OCO5)=O)CC1)OC(C)(C)CCOC6=NO[N+]([O-])=C6S(=O)(C7=CC=CC=C7)=O	0.87 ¡À 0.09	0.91 ¡À 0.11
7h	O=C(CN1CCN(CCOC(C2=CC(OC)=C3C(OCO3)=C2C4=C(C(OC)=O)C=C(OC)C5=C4OCO5)=O)CC1)OCCCCOC6=NO[N+]([O-])=C6S(=O)(C7=CC=CC=C7)=O	0.69 ¡À 0.05	1.57 ¡À 0.08
7i	O=C(CN1CCN(CCOC(C2=CC(OC)=C3C(OCO3)=C2C4=C(C(OC)=O)C=C(OC)C5=C4OCO5)=O)CC1)OCCCOC6=NO[N+]([O-])=C6S(=O)(C7=CC=CC=C7)=O	0.75 ¡À 0.07	0.93 ¡À 0.11
7j	O=C(CN1CCN(CCOC(C2=CC(OC)=C3C(OCO3)=C2C4=C(C(OC)=O)C=C(OC)C5=C4OCO5)=O)CC1)OCCOC6=NO[N+]([O-])=C6S(=O)(C7=CC=CC=C7)=O	0.58 ¡À 0.04	2.01 ¡À 0.13
7k	O=C(CN1CCN(CCOC(C2=CC(OC)=C3C(OCO3)=C2C4=C(C(OC)=O)C=C(OC)C5=C4OCO5)=O)CC1)NCCOC6=NO[N+]([O-])=C6S(=O)(C7=CC=CC=C7)=O	0.55 ¡À 0.03	3.01 ¡À 0.32
7l	O=C(CN1CCN(CCOC(C2=CC(OC)=C3C(OCO3)=C2C4=C(C(OC)=O)C=C(OC)C5=C4OCO5)=O)CC1)OCCOCCOC6=NO[N+]([O-])=C6S(=O)(C7=CC=CC=C7)=O	0.38 ¡À 0.04	2.30 ¡À 0.18
7m	O=C(CN1CCN(CCOC(C2=CC(OC)=C3C(OCO3)=C2C4=C(C(OC)=O)C=C(OC)C5=C4OCO5)=O)CC1)OC(C)CCOC6=NO[N+]([O-])=C6S(=O)(C7=CC=CC=C7)=O	0.38 ¡À 0.02	0.81 ¡À 0.08
7n	O=C(CN1CCN(CCOC(C2=CC(OC)=C3C(OCO3)=C2C4=C(C(OC)=O)C=C(OC)C5=C4OCO5)=O)CC1)OC(C)(C)CCOC6=NO[N+]([O-])=C6S(=O)(C7=CC=CC=C7)=O	0.86 ¡À 0.07	1.51 ¡À 0.13
7o	O=C(CN1CCC(OC(C2=CC(OC)=C3C(OCO3)=C2C4=C(C(OC)=O)C=C(OC)C5=C4OCO5)=O)CC1)OCCCCOC6=NON=C6S(=O)(C7=CC=CC=C7)=O	68 ¡À 5.7	73 ¡À 9.3
7p	O=C(CN1CCC(OC(C2=CC=CC=C2)=O)CC1)OCCCCOC3=NO[N+]([O-])=C3S(=O)(C4=CC=CC=C4)=O	4.06 ¡À 0.13	6.65 ¡À 0.25
4a	O=C(CN1CCC(O)CC1)OCCCCOC2=NO[N+]([O-])=C2S(=O)(C3=CC=CC=C3)=O	2.25 ¡À 0.19	4.11 ¡À 0.21
5	O=C(C1=C(C2=C(OCO3)C3=C(OC)C=C2C(O)=O)C4=C(OCO4)C(OC)=C1)OC	137 ¡À 10.2	125 ¡À 8.0
bifendate	O=C(C1=C(C2=C(OCO3)C3=C(OC)C=C2C(OC)=O)C4=C(OCO4)C(OC)=C1)OC	>200	>200
ADR	O=C1C2=C(C(O)=C([C@@H](O[C@H]3C[C@H](N)[C@@H](O)[C@H](C)O3)C[C@](O)(C(CO)=O)C4)C4=C2O)C(C5=C(OC)C=CC=C51)=O	0.59 ¡À 0.06	24.46 ¡À 0.31
